# Supplementary material for: Brain networks involved in tactile speed classification of moving dot patterns: the effects of speed and dot periodicity
Source: PubMed Central journal article supplement (PMC5286508; doi:10.1038/srep40931), 2017-02-01
Supplement: srep40931-s1.pdf [file srep40931-s1.pdf]

## **Supplementary Information**

### **Brain networks involved in tactile speed classification of moving dot patterns: the effects of speed and dot periodicity**

Jiajia Yang, Ryo Kitada<sup>\*</sup>, Takanori Kochiyama, Yinghua Yu, Kai Makita, Yuta Araki,  
Jinglong Wu, Norihiro Sadato

<sup>\*</sup>To whom correspondence should be addressed. E-mail: kitada@nips.ac.jp

**This information includes:**

**7 Supplemental Tables**

**2 Supplemental Figures**

**Supplementary Table 1 Predefined contrasts**

|                                         | SCP  |      |      |      |      | VMCp |    |     |     |     | SCN  |      |      |      |      | VMCn |    |     |     |     |
|-----------------------------------------|------|------|------|------|------|------|----|-----|-----|-----|------|------|------|------|------|------|----|-----|-----|-----|
|                                         | 60   | 90   | 100  | 120  | 140  | 60   | 90 | 100 | 120 | 140 | 60   | 90   | 100  | 120  | 140  | 60   | 90 | 100 | 120 | 140 |
| <b>T contrasts</b>                      |      |      |      |      |      |      |    |     |     |     |      |      |      |      |      |      |    |     |     |     |
| c01. SCP - VMCp                         | 1    | 1    | 1    | 1    | 1    | -1   | -1 | -1  | -1  | -1  | 0    | 0    | 0    | 0    | 0    | 0    | 0  | 0   | 0   | 0   |
| c02. SCN - VMCn                         | 0    | 0    | 0    | 0    | 0    | 0    | 0  | 0   | 0   | 0   | 1    | 1    | 1    | 1    | 1    | -1   | -1 | -1  | -1  | -1  |
| c03. Speed+                             | -1.4 | -0.4 | -0.1 | 0.6  | 1.3  | 0    | 0  | 0   | 0   | 0   | -1.4 | -0.4 | -0.1 | 0.6  | 1.3  | 0    | 0  | 0   | 0   | 0   |
| c04. Speed-                             | 1.4  | 0.4  | 0.1  | -0.6 | -1.3 | 0    | 0  | 0   | 0   | 0   | 1.4  | 0.4  | 0.1  | -0.6 | -1.3 | 0    | 0  | 0   | 0   | 0   |
| c05. (SCP – VMCp) – (SCN – VMCn)        | 1    | 1    | 1    | 1    | 1    | -1   | -1 | -1  | -1  | -1  | -1   | -1   | -1   | -1   | -1   | 1    | 1  | 1   | 1   | 1   |
| c06. (SCN – VMCn) – (SCP – VMCp)        | -1   | -1   | -1   | -1   | -1   | 1    | 1  | 1   | 1   | 1   | 1    | 1    | 1    | 1    | 1    | -1   | -1 | -1  | -1  | -1  |
| <b>F contrasts</b>                      |      |      |      |      |      |      |    |     |     |     |      |      |      |      |      |      |    |     |     |     |
| c07. Interaction effect                 | 1    | -1   | 0    | 0    | 0    | -1   | 1  | 0   | 0   | 0   | -1   | 1    | 0    | 0    | 0    | 1    | -1 | 0   | 0   | 0   |
|                                         | 0    | 1    | -1   | 0    | 0    | 0    | -1 | 1   | 0   | 0   | 0    | -1   | 1    | 0    | 0    | 0    | 1  | -1  | 0   | 0   |
|                                         | 0    | 0    | 1    | -1   | 0    | 0    | 0  | -1  | 1   | 0   | 0    | 0    | -1   | 1    | 0    | 0    | 0  | 1   | -1  | 0   |
|                                         | 0    | 0    | 0    | 1    | -1   | 0    | 0  | 0   | -1  | 1   | 0    | 0    | 0    | -1   | 1    | 0    | 0  | 0   | 1   | -1  |
| c08. The main effect of speed           | 1    | -1   | 0    | 0    | 0    | 0    | 0  | 0   | 0   | 0   | 1    | -1   | 0    | 0    | 0    | 0    | 0  | 0   | 0   | 0   |
|                                         | 0    | 1    | -1   | 0    | 0    | 0    | 0  | 0   | 0   | 0   | 0    | 1    | -1   | 0    | 0    | 0    | 0  | 0   | 0   | 0   |
|                                         | 0    | 0    | 1    | -1   | 0    | 0    | 0  | 0   | 0   | 0   | 0    | 0    | 1    | -1   | 0    | 0    | 0  | 0   | 0   | 0   |
|                                         | 0    | 0    | 0    | 1    | -1   | 0    | 0  | 0   | 0   | 0   | 0    | 0    | 0    | 1    | -1   | 0    | 0  | 0   | 0   | 0   |
| c09. The main effect of dot periodicity | 1    | 1    | 1    | 1    | 1    | -1   | -1 | -1  | -1  | -1  | -1   | -1   | -1   | -1   | -1   | 1    | 1  | 1   | 1   | 1   |

Note that regressors in VMCp and VMCn were made such that each regressor emulated the regressor of each motion speed (stimulus onset and duration) in the tactile classification task. SCP: speed classification-periodic; SCN: speed classification-non-periodic. VMCp: visual motor control-periodic; VMCn: visual motor control-non-periodic.

**Supplementary Table 2. Brain regions activated by speed classification of periodic and non-periodic surfaces**

| Spatial extent test                                                        |         | MNI coordinates |       |     | T value | Hem | Anatomical region        |
|----------------------------------------------------------------------------|---------|-----------------|-------|-----|---------|-----|--------------------------|
| Cluster size (mm <sup>3</sup> )                                            | P-value | x               | y     | z   |         |     |                          |
| <b>Brain regions more strongly activated by SCP than VMCP (SCP - VMCP)</b> |         |                 |       |     |         |     |                          |
| 115792                                                                     | <0.001  | -30             | -46   | 66  | 6.94    | L   | Superior parietal lobule |
|                                                                            |         | -50             | -28   | 58  | 16.22   | L   | Postcentral gyrus        |
|                                                                            |         | -54             | 8     | 22  | 6.97    | L   | Precentral gyrus         |
|                                                                            |         | -48             | -22   | 20  | 17.65   | L   | Parietal operculum       |
|                                                                            |         | -42             | 36    | 18  | 5.92    | L   | Middle frontal gyrus     |
|                                                                            |         | -38             | -18   | 14  | 11.77   | L   | Insula                   |
|                                                                            |         | -42             | 42    | 8   | 5.66    | L   | Inferior frontal gyrus   |
|                                                                            |         | -12             | -24   | 8   | 5.25    | L   | Thalamus                 |
|                                                                            |         | 10              | -26   | 8   | 3.59    | R   | Thalamus                 |
|                                                                            |         | -14             | 6     | -6  | 5.22    | L   | Putamen                  |
| 88256                                                                      | <0.001  | -6              | -28   | -18 | 5.09    | L   | Brainstem                |
|                                                                            |         | 6               | -30   | -20 | 4.44    | R   | Brainstem                |
|                                                                            |         | 56              | -44   | 52  | 5.98    | R   | Inferior parietal lobule |
|                                                                            |         | 36              | -2    | 50  | 4.31    | R   | Middle frontal gyrus     |
|                                                                            |         | 50              | 8     | 22  | 7.88    | R   | Precentral gyrus         |
|                                                                            |         | 54              | -20   | 22  | 12.81   | R   | Parietal operculum       |
|                                                                            |         | 44              | 40    | 8   | 8.19    | R   | Inferior frontal gyrus   |
|                                                                            |         | 32              | 22    | 2   | 8.62    | R   | Insula                   |
|                                                                            |         | 52              | 20    | -10 | 4.58    | R   | Inferior frontal gyrus   |
|                                                                            |         | 3784            | <0.01 | -12 | -24     | 42  | 7.74                     |
| 18104                                                                      | <0.001  | -12             | 22    | 66  | 3.11    | L   | Superior frontal gyrus   |
|                                                                            |         | 6               | 20    | 48  | 7.41    | R   | Superior frontal gyrus   |
|                                                                            |         | -2              | 4     | 36  | 4.23    | L   | Cingulate gyrus          |
|                                                                            |         | 6               | 10    | 26  | 3.12    | R   | Cingulate gyrus          |
| 2800                                                                       | <0.05   | 16              | 4     | -4  | 5.13    | R   | Putamen                  |
| 2904                                                                       | <0.05   | -18             | -78   | -50 | 6.68    | L   | Cerebellum               |
| 7032                                                                       | <0.001  | 18              | -68   | -48 | 6.65    | R   | Cerebellum               |
| 4440                                                                       | <0.01   | -22             | -70   | -26 | 4.95    | L   | Cerebellum               |

**Brain regions more strongly activated by SCN than VMcN**

**(SCN -VMcN)**

|       |        |     |     |     |       |   |                          |
|-------|--------|-----|-----|-----|-------|---|--------------------------|
| 67024 | <0.001 | -36 | -46 | 66  | 5.10  | L | Superior parietal lobule |
|       |        | -32 | -4  | 56  | 3.76  | L | Middle frontal gyrus     |
|       |        | -58 | -22 | 46  | 13.19 | L | Postcentral gyrus        |
|       |        | -54 | -46 | 40  | 3.49  | L | Inferior parietal lobule |
|       |        | -50 | -22 | 20  | 14.29 | L | Parietal operculum (PO)  |
|       |        | -58 | 6   | 12  | 5.83  | L | Precentral gyrus         |
|       |        | -40 | -6  | 8   | 7.81  | L | Insula                   |
|       |        | -46 | 12  | -8  | 3.41  | L | Inferior frontal gyrus   |
| 83176 | <0.001 | 40  | 2   | 58  | 4.27  | R | Middle frontal gyrus     |
|       |        | 60  | -28 | 48  | 6.62  | R | Inferior parietal lobule |
|       |        | 50  | 4   | 42  | 4.29  | R | Precentral gyrus         |
|       |        | 56  | -18 | 22  | 11.41 | R | Parietal operculum (PO)  |
|       |        | 56  | 14  | 10  | 8.02  | R | Inferior frontal gyrus   |
|       |        | 32  | 20  | 0   | 8.48  | R | Insula                   |
| 14192 | <0.001 | 6   | 22  | 46  | 7.83  | R | Superior frontal gyrus   |
|       |        | -4  | 22  | 44  | 6.55  | L | Superior frontal gyrus   |
|       |        | 10  | 16  | 28  | 2.87  | R | Cingulate gyrus          |
| 5848  | <0.01  | 16  | -70 | -52 | 6.84  | R | Cerebellum               |
| 9272  | <0.001 | -10 | -16 | 8   | 4.91  | L | Thalamus                 |
|       |        | 8   | -14 | 4   | 4.64  | R | Thalamus                 |
|       |        | -14 | 6   | -2  | 5.08  | L | Putamen                  |
| 4640  | <0.01  | -42 | 42  | 12  | 4.50  | L | Inferior frontal gyrus   |
| 2760  | <0.05  | 24  | -54 | -26 | 4.33  | R | Cerebellum               |
| 2536  | <0.05  | -24 | -66 | -28 | 4.23  | L | Cerebellum               |
| 2536  | <0.05  | -8  | -26 | -12 | 3.86  | L | Brainstem                |
|       |        | 6   | -26 | -14 | 3.95  | R | Brainstem                |

The extent threshold of activation was  $P < 0.05$ , FDR corrected for multiple comparisons over the whole brain with height threshold set at  $P < 0.005$  uncorrected (one-tailed). Hem, hemisphere; R: right; L: left.

**Supplementary Table 3. Brain regions commonly activated by periodic and non-periodic surfaces (conjunction analysis)**

| Spatial extent test                                        |         | MNI coordinates |     |     | T value | Hem | Anatomical region        |
|------------------------------------------------------------|---------|-----------------|-----|-----|---------|-----|--------------------------|
| Cluster size(mm <sup>3</sup> )                             | P-value | X               | y   | z   |         |     |                          |
| <b>Common activation between SCP - VMCP and SCN - VMCN</b> |         |                 |     |     |         |     |                          |
| <b>(Conjunction analysis of SCP - VMCP and SCN - VMCN)</b> |         |                 |     |     |         |     |                          |
| 64624                                                      | < 0.001 | -36             | -46 | 66  | 5.10    | L   | Superior parietal lobule |
|                                                            |         | -36             | -4  | 62  | 3.76    | L   | Precentral gyrus         |
|                                                            |         | -58             | -22 | 46  | 13.19   | L   | Postcentral gyrus        |
|                                                            |         | -50             | -22 | 20  | 14.29   | L   | Parietal operculum       |
|                                                            |         | -40             | -6  | 8   | 7.81    | L   | Insula                   |
| 72744                                                      | < 0.001 | 62              | -26 | 40  | 7.04    | R   | Inferior parietal lobule |
|                                                            |         | 56              | -18 | 22  | 11.41   | R   | Parietal operculum       |
|                                                            |         | 58              | 12  | 14  | 7.52    | R   | Inferior frontal gyrus   |
|                                                            |         | 32              | 22  | 0   | 8.39    | R   | Insula                   |
| 11352                                                      | < 0.001 | -4              | 22  | 44  | 6.43    | L   | Superior frontal gyrus   |
|                                                            |         | 6               | 20  | 48  | 7.41    | R   | Superior frontal gyrus   |
| 4856                                                       | < 0.01  | 16              | -70 | -52 | 6.46    | R   | Cerebellum               |
|                                                            |         | 30              | -50 | -50 | 3.61    | R   | Cerebellum               |
| 1896                                                       | < 0.05  | -14             | 6   | -4  | 4.94    | L   | Putamen                  |
| 3976                                                       | < 0.01  | -12             | -18 | 10  | 4.72    | L   | Thalamus                 |
|                                                            |         | 10              | -16 | 12  | 3.36    | R   | Thalamus                 |
| 4600                                                       | < 0.01  | -42             | 42  | 12  | 4.50    | L   | Inferior frontal gyrus   |
| 2120                                                       | < 0.05  | -24             | -68 | -28 | 4.19    | L   | Cerebellum               |
| 1880                                                       | < 0.05  | 20              | -66 | -22 | 4.16    | R   | Cerebellum               |
| <b>Common activation between VMCP - SCP and VMCN - SCN</b> |         |                 |     |     |         |     |                          |
| <b>(Conjunction analysis of VMCP - SCP and VMCN - SCN)</b> |         |                 |     |     |         |     |                          |
| 52176                                                      | <0.001  | -6              | -38 | 38  | 5.16    | L   | Cingulate gyrus          |
|                                                            |         | 26              | -76 | 32  | 5.32    | R   | Superior occipital gyrus |
|                                                            |         | -44             | -74 | 30  | 4.35    | L   | Angular gyrus            |
|                                                            |         | -16             | -84 | 28  | 4.80    | L   | Superior occipital gyrus |
|                                                            |         | -10             | -58 | 20  | 4.18    | L   | Precuneus                |
|                                                            |         | 36              | -76 | 6   | 4.87    | R   | Middle occipital gyrus   |
|                                                            |         | -36             | -78 | 2   | 3.73    | L   | Middle occipital gyrus   |
|                                                            |         | 42              | -62 | -4  | 5.58    | R   | Fusiform gyrus           |

|       |        |     |     |     |      |   |                         |
|-------|--------|-----|-----|-----|------|---|-------------------------|
|       |        | -46 | -56 | -12 | 4.11 | L | Inferior temporal gyrus |
|       |        | 38  | -48 | -18 | 4.25 | R | Fusiform gyrus          |
|       |        | -4  | -66 | -22 | 4.46 | L | Cerebellum              |
| 17248 | <0.001 | 46  | -14 | 54  | 5.31 | R | Postcentral gyrus       |
|       |        | 38  | -16 | 42  | 6.21 | R | Precentral gyrus        |
| 12832 | <0.001 | -16 | 56  | 16  | 3.39 | L | Middle frontal gyrus    |
|       |        | 6   | 56  | 14  | 5.34 | R | Superior frontal gyrus  |
|       |        | -6  | 52  | 10  | 5.66 | L | Superior frontal gyrus  |

---

The extent threshold of activation was  $P < 0.05$ , FDR corrected for multiple comparisons over the whole brain with the height threshold set at  $P < 0.005$  uncorrected (one-tailed). Hem, hemisphere; R, right; L, left. Conjunction analysis was conducted with a conjunction-null hypothesis (Nichols et al., 2005).

**Supplementary Table 4 F tests on main effects of speed and periodicity and their interaction.**

| Spatial extent test                                                     |         | MNI coordinates |     |    | F value | Hem | Anatomical region         |
|-------------------------------------------------------------------------|---------|-----------------|-----|----|---------|-----|---------------------------|
| Cluster size (mm <sup>3</sup> )                                         | P-value | x               | y   | z  |         |     |                           |
| <b><i>The interaction effects between speed and dot periodicity</i></b> |         |                 |     |    |         |     |                           |
| No significant activation                                               |         |                 |     |    |         |     |                           |
| <b><i>The main effect of speed</i></b>                                  |         |                 |     |    |         |     |                           |
| 384888                                                                  | < 0.001 | -26             | -50 | 66 | 10.38   | L   | Superior parietal lobule  |
|                                                                         |         | 22              | -46 | 70 | 9.36    | R   | Superior parietal lobule  |
|                                                                         |         | -26             | -16 | 68 | 11.32   | L   | Precentral gyrus          |
|                                                                         |         | 52              | 0   | 4  | 10.19   | R   | Precentral gyrus          |
|                                                                         |         | -44             | -30 | 60 | 13.88   | L   | Postcentral gyrus         |
|                                                                         |         | 32              | -28 | 62 | 9.19    | R   | Postcentral gyrus         |
|                                                                         |         | -6              | -8  | 56 | 11.26   | L   | Superior frontal gyrus    |
|                                                                         |         | 16              | 2   | 68 | 12.67   | R   | Superior frontal gyrus    |
|                                                                         |         | -32             | -82 | 42 | 7.12    | L   | Angular gyrus             |
|                                                                         |         | 50              | -38 | 20 | 9.53    | R   | Angular gyrus             |
|                                                                         |         | -6              | -74 | 34 | 12.98   | L   | Precuneus                 |
|                                                                         |         | 8               | -72 | 42 | 10.81   | R   | Precuneus                 |
|                                                                         |         | -46             | -26 | 32 | 7.66    | L   | Supramarginal gyrus       |
|                                                                         |         | 54              | -20 | 44 | 9.01    | R   | Supramarginal gyrus       |
|                                                                         |         | 26              | -80 | 38 | 5.2     | R   | Superior occipital gyrus  |
|                                                                         |         | -4              | -28 | 30 | 15.97   | L   | Posterior cingulate gyrus |
|                                                                         |         | 6               | -24 | 40 | 19.35   | R   | Posterior cingulate gyrus |
|                                                                         |         | -60             | -22 | 16 | 15.64   | L   | Parietal operculum        |
|                                                                         |         | 52              | -22 | 20 | 14.38   | R   | Parietal operculum        |
|                                                                         |         | -6              | -70 | 16 | 3.72    | L   | Cuneus                    |
|                                                                         |         | 4               | -78 | 10 | 7.16    | R   | Cuneus                    |
|                                                                         |         | -52             | -70 | 10 | 9.43    | L   | Middle occipital gyrus    |
|                                                                         |         | 38              | -76 | 2  | 7.81    | R   | Middle occipital gyrus    |
|                                                                         |         | -30             | -22 | 0  | 5.07    | L   | Putamen                   |
|                                                                         |         | 28              | -12 | 10 | 4.09    | R   | Putamen                   |
|                                                                         |         | -50             | -68 | 8  | 9.24    | L   | Middle temporal gyrus     |
|                                                                         |         | 44              | -50 | 6  | 8.89    | R   | Middle temporal gyrus     |

|                                                  |       |     |     |     |       |   |                          |
|--------------------------------------------------|-------|-----|-----|-----|-------|---|--------------------------|
|                                                  |       | 48  | 0   | 4   | 10.17 | R | Inferior frontal gyrus   |
|                                                  |       | -40 | -4  | 4   | 11.81 | L | Insula                   |
|                                                  |       | 40  | 0   | -10 | 13.4  | R | Insula                   |
|                                                  |       | -18 | 24  | -4  | 8.15  | L | Caudate nucleus          |
|                                                  |       | 10  | 18  | 8   | 6.15  | R | Caudate nucleus          |
|                                                  |       | -26 | -36 | 0   | 13.99 | L | Hippocampus              |
|                                                  |       | 34  | -22 | -14 | 13.97 | R | Hippocampus              |
|                                                  |       | 30  | 42  | 22  | 9.22  | R | Middle frontal gyrus     |
|                                                  |       | -18 | -34 | -8  | 10.8  | L | Parahippocampal gyrus    |
|                                                  |       | 16  | -32 | -2  | 14.32 | R | Parahippocampal gyrus    |
|                                                  |       | -50 | 4   | -4  | 7.28  | L | Superior temporal gyrus  |
|                                                  |       | 48  | 12  | -10 | 7.83  | R | Superior temporal gyrus  |
|                                                  |       | -14 | 44  | -6  | 13.95 | L | Medial prefrontal cortex |
|                                                  |       | 6   | 52  | -6  | 9.26  | R | Medial prefrontal cortex |
|                                                  |       | -28 | -6  | -12 | 5.17  | L | Amygdala                 |
|                                                  |       | 22  | -2  | -14 | 7.89  | R | Amygdala                 |
|                                                  |       | -24 | 32  | -16 | 8.11  | L | Orbitofrontal gyrus      |
|                                                  |       | 22  | 30  | -8  | 6.72  | R | Orbitofrontal gyrus      |
|                                                  |       | -48 | -56 | -16 | 9.2   | L | Inferior temporal gyrus  |
|                                                  |       | 48  | -46 | -12 | 7.9   | R | Inferior temporal gyrus  |
|                                                  |       | -2  | -82 | -16 | 6.92  | L | Lingual gyrus            |
|                                                  |       | 8   | -82 | -14 | 7.46  | R | Lingual gyrus            |
|                                                  |       | -40 | -42 | -26 | 5.49  | L | Fusiform gyrus           |
|                                                  |       | 40  | -42 | -14 | 7.82  | R | Fusiform gyrus           |
|                                                  |       | -18 | -84 | -20 | 7.92  | L | Inferior occipital gyrus |
|                                                  |       | 32  | -76 | -18 | 12.24 | R | Inferior occipital gyrus |
|                                                  |       | -42 | -58 | -26 | 10.41 | L | Cerebellum               |
|                                                  |       | 36  | -52 | -26 | 12.91 | R | Cerebellum               |
|                                                  |       | -18 | -38 | -38 | 6.73  | L | Brainstem                |
|                                                  |       | 22  | -22 | -10 | 9.8   | R | Brainstem                |
| 4144                                             | 0.011 | -36 | 42  | 22  | 9.4   | L | Middle frontal gyrus     |
| 3288                                             | 0.023 | 30  | 24  | 0   | 6.09  | R | Insula                   |
|                                                  |       | 42  | 36  | 10  | 5.57  | R | Inferior frontal gyrus   |
| <b><i>The main effect of dot periodicity</i></b> |       |     |     |     |       |   |                          |
| 5208                                             | 0.009 | -42 | -24 | 54  | 13.76 | L | Postcentral gyrus        |
|                                                  |       | -22 | -42 | 68  | 11.74 | L | Superior parietal lobule |

---



The extent threshold of activation was  $P < 0.05$ , FDR corrected for multiple comparisons over the whole brain with the height threshold set at  $P < 0.01$  (uncorrected). Hem, hemisphere; R, right; L, left.

**Supplementary Table 5 Brain activation related to motion speed (t contrasts)**

| Spatial extent test                                                                                     |         | MNI coordinate |     |     | T value | Hem | Anatomical region       |
|---------------------------------------------------------------------------------------------------------|---------|----------------|-----|-----|---------|-----|-------------------------|
| Cluster size (mm <sup>3</sup> )                                                                         | P-value | X              | y   | Z   |         |     |                         |
| <b><i>Brain regions of which activity was positively related to motion speed (Speed+, Figure 4)</i></b> |         |                |     |     |         |     |                         |
| 4680                                                                                                    | <0.01   | -6             | 22  | 44  | 4.04    | L   | Superior frontal gyrus  |
|                                                                                                         |         | 6              | 20  | 50  | 4.37    | R   | Superior frontal gyrus  |
| 6344                                                                                                    | <0.05   | 36             | 26  | 6   | 4.63    | R   | Inferior frontal gyrus  |
|                                                                                                         |         | 36             | 16  | -6  | 3.23    | R   | Insula                  |
| 3160                                                                                                    | < 0.05  | -40            | -18 | 18  | 4.32    | L   | Parietal operculum (PO) |
| <b><i>Brain regions of which activity was negatively related to motion speed (Speed-)</i></b>           |         |                |     |     |         |     |                         |
| 15192                                                                                                   | < 0.001 | 32             | -28 | 50  | 5.04    | R   | Postcentral gyrus       |
|                                                                                                         |         | 26             | -18 | 72  | 4.09    | R   | Precentral gyrus        |
| 10344                                                                                                   | < 0.001 | -16            | -52 | -20 | 5.66    | L   | Cerebellum              |

The extent threshold of activation was  $P < 0.05$ , FDR corrected for multiple comparisons over the whole brain with height threshold set at  $P < 0.005$  uncorrected (one-tailed). Hem, hemisphere; L, left; R, right.

**Supplementary Table 6 Differences in brain activation between periodic and non-periodic surfaces (t contrasts)**

| Spatial extent test                                                                                               |         | MNI coordinate |     |    | T value | Hem | Anatomical region        |
|-------------------------------------------------------------------------------------------------------------------|---------|----------------|-----|----|---------|-----|--------------------------|
| Cluster size (mm <sup>3</sup> )                                                                                   | P-value | X              | y   | z  |         |     |                          |
| <b>Brain regions more strongly activated by SCP than SCN (Figure 5)</b><br><b>[(SCP - VM Cp) - (SCN - VM Cn)]</b> |         |                |     |    |         |     |                          |
| 5208                                                                                                              | <0.01   | -22            | -42 | 68 | 3.43    | L   | Superior parietal lobule |
|                                                                                                                   |         | -42            | -24 | 54 | 3.71    | L   | Postcentral gyrus        |
| <b>Brain regions more strongly activated by SCN than SCP</b><br><b>[(SCN - VM Cn) - (SCP - VM Cp)]</b>            |         |                |     |    |         |     |                          |
| No significant activation                                                                                         |         |                |     |    |         |     |                          |

The extent threshold of activation was  $P < 0.05$ , FDR corrected for multiple comparisons over the whole brain with height threshold set at  $P < 0.005$  uncorrected (one-tailed). Hem, hemisphere; L, left.

**Supplementary Table 7 Psycho-physiological interaction (PPI) analysis**

| Spatial extent test                                                                                                |         | MNI coordinate |     |     | T value | Hem | Anatomical region           |
|--------------------------------------------------------------------------------------------------------------------|---------|----------------|-----|-----|---------|-----|-----------------------------|
| Cluster size (mm <sup>3</sup> )                                                                                    | P-value | x              | y   | z   |         |     |                             |
| <i>Psycho-physiological interaction (PPI) analysis with the left postcentral gyrus as a seed region (Figure 6)</i> |         |                |     |     |         |     |                             |
| 2024                                                                                                               | < 0.05  | -32            | 16  | 4   | 4.98    | L   | Insula                      |
|                                                                                                                    |         | -28            | 24  | -12 | 5.77    | L   | Lateral orbitofrontal gyrus |
| 5160                                                                                                               | <0.01   | -52            | -26 | 50  | 3.97    | L   | Postcentral gyrus           |
|                                                                                                                    |         | -48            | -50 | 46  | 5.04    | L   | Inferior parietal lobule    |
|                                                                                                                    |         | -34            | -48 | 38  | 3.98    | L   | Superior parietal lobule    |
| 2240                                                                                                               | <0.05   | -34            | 0   | 34  | 3.69    | L   | Middle frontal gyrus        |
|                                                                                                                    |         | -46            | 8   | 26  | 4.99    | L   | Inferior frontal gyrus      |
| 2864                                                                                                               | <0.05   | -50            | -18 | 20  | 4.82    | L   | Parietal operculum (PO)     |
| 1944                                                                                                               | <0.05   | 56             | 10  | 38  | 3.98    | R   | Precentral gyrus            |
|                                                                                                                    |         | 52             | 12  | 30  | 4.52    | R   | Inferior frontal gyrus      |
| 3936                                                                                                               | < 0.01  | 24             | -72 | 2   | 4.28    | R   | Lingual gyrus               |
|                                                                                                                    |         | 40             | -64 | -18 | 3.83    | R   | Inferior occipital gyrus    |
|                                                                                                                    |         | 44             | -56 | -24 | 3.37    | R   | Fusiform gyrus              |
|                                                                                                                    |         | 30             | -66 | -32 | 3.89    | R   | Cerebellum                  |

The extent threshold of activation was  $P < 0.05$ , FDR corrected for multiple comparisons over the whole brain with height threshold set at  $P < 0.005$  uncorrected (one-tailed). Hem, hemisphere; L, left; R, right.

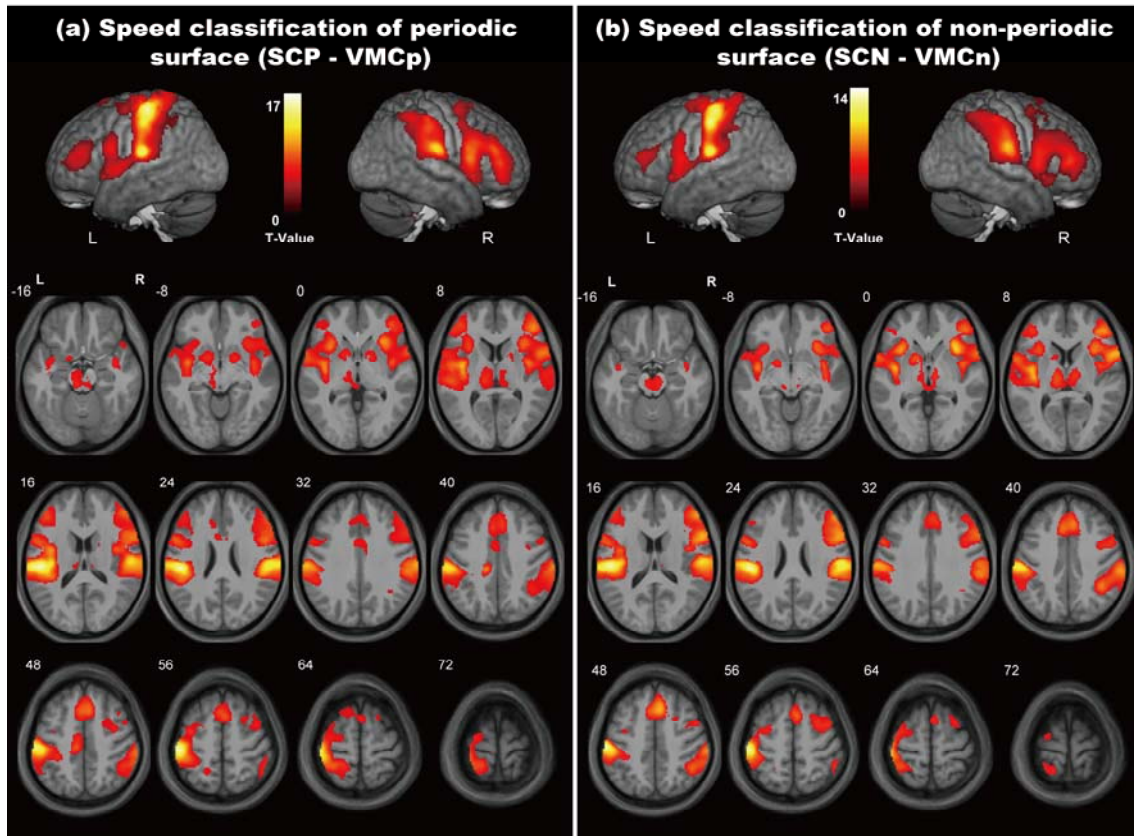

**Supplementary Figure 1. Brain activation during speed classification tasks (relative to visual motor control, VMC)**

The results of the contrast of SCP–VMCP and SCN–VMCN are depicted above. Areas of significant activation are rendered and superimposed on the T1-weighted MRI averaged across the participants. Each number located at the top left of each horizontal slice indicates z coordinate (from -16 to 72). The extent threshold of activation was  $P < 0.05$ , FDR corrected for multiple comparisons over the whole brain with the height threshold set at  $P < 0.005$  uncorrected (one-tailed). R, right; L, left.

## Overlap of main effects of speed and dot periodicity (Overlap of F tests)

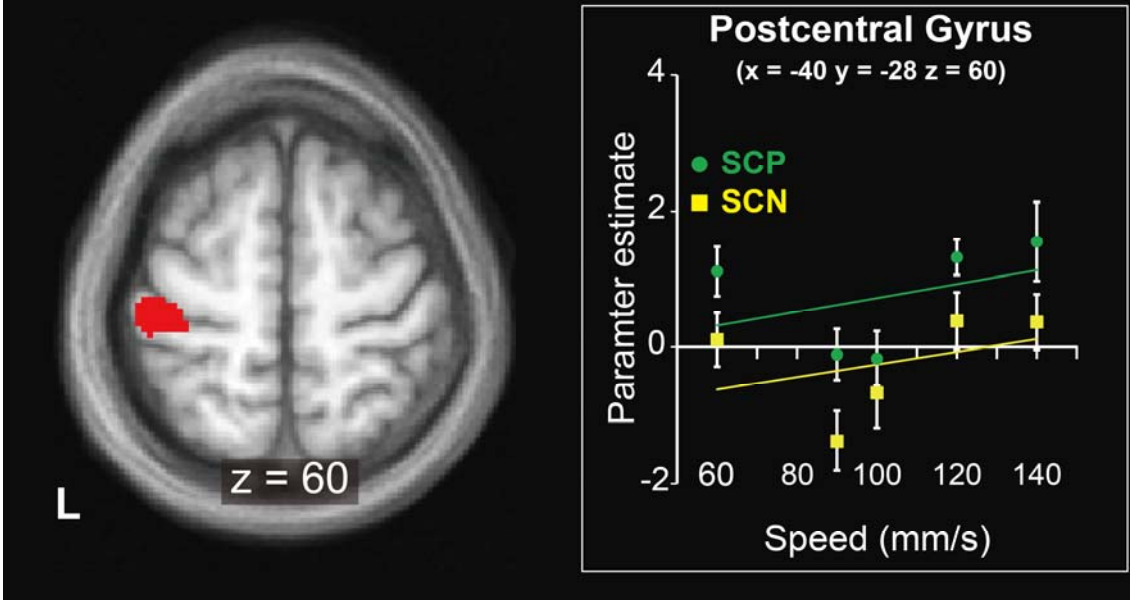

### Supplementary Figure 2. Overlap of main effects of speed and dot periodicity

Overlap of activation between main effects of speed and dot periodicity, which were evaluated by the F contrasts. Two-way repeated measures ANOVA (5 levels of speed  $\times$  2 levels of dot periodicity) of activity in the center of mass of overlap ( $x = -48, y = -28, z = 60$ ) showed both main effects of periodicity ( $F(1, 19) = 10.2, p = 0.005$ ) and speed ( $F(4, 76) = 13.1, p < 0.001$ ) without interactions ( $P = 0.67$ ). One sample t tests showed that mean fitted slopes of linear functions were significantly greater than zero ( $t(19) = 2.23, p = 0.04$  for periodic and  $t(19) = 2.36, p = 0.03$  for non-periodic surfaces). Areas of significant activation are superimposed on the T1-weighted MRI averaged across the participants. The extent threshold of activation was  $P < 0.05$ , FDR corrected for multiple comparisons over the whole brain with the height threshold set at  $P < 0.01$  (uncorrected). R, right; L, left.

## References

1. Nichols, T., Brett, M., Andersson, J., Wager, T. & Poline, J. B. Valid conjunction inference with the minimum statistic. *NeuroImage* 25, 653-660 (2005).
